# Supplementary material for: Whole-genome characterization of Rosa chinensis AP2/ERF transcription factors and analysis of negative regulator RcDREB2B in Arabidopsis
Source: BMC Genomics. 2021 Jan 28;22:90. doi: 10.1186/s12864-021-07396-6 (PMC7844920; doi:10.1186/s12864-021-07396-6)
Supplement: Supplementary file 2 — Additional file 2: Table S2. Primer sequences used in this study. [file 12864_2021_7396_MOESM2_ESM.xlsx]

## Sheet: Table S2
Table S2 Primer sequences used in this study
Primer name		Sequence(5'-3')
For isolation of RcDREB2B in rose
RcDREB2B-FL	Forward	ATGACCAAGTTGAAAAAATTCC
	Reverse	TCATTCATCCTCCTCAGTATGATTT
For RcDREB2B transactivation analysis
pBD-RcDREB2B	Forward	CGCCATATGATGACCAAGTTGAAAAAATTCC
	Reverse	GCGGAATTCTTCATCCTCCTCAGTATGATTT
For RT-qPCR analysis in rose
qRT-RcDREB2B	Forward	GCTGCTCTTGCCTACGATGA
	Reverse	ACAGGAAGGAGCCGATAGAGT
qRT-RcUBI1	Forward	GGGCAATCATCTGGAAGTGCTCGT
	Reverse	GCCCCCAAAGAGAAACCCTGCG
For RcDREB2B overexpressing in Arabidopsis
RcDREB2B-OE	Forward	CTAGTCGACATGACCAAGTTGAAAAAATTCC
	Reverse	GCACTAGTTCATTCATCCTCCTCAGTATGATTT
AtDREB2B-OE	Forward	CCGGATTTGCTTACTGTTGC
	Reverse	GGTTTTGGTCTTGGCTCTGA
For RT-qPCR analysis in Arabidopsis
qRT-AtACTIN2	Forward	CTAAGCTCTCAAGATCAAAGGC
	Reverse	AACATTGCAAAGAGTTTCAAGG
qRT-AtDREB2A	Forward	TGACCTAAATGGCGACGATG
	Reverse	TGTTGACTCTCGGGCCTGTA
qRT-AtWRKY33	Forward	CGATTGTCAGCAGAGACGAA
	Reverse	GTCTTGCTTCCACCACCATT
qRT-AtERF5	Forward	TCTTCGGATCATCGTCCTCTTC
	Reverse	GGTTTGCATACGGATTCAGAGAA
qRT-AtKINI	Forward	AACAAGAATGCCTTCCAAGC
	Reverse	CGCATCCGATACACTCTTTCC
qRT-AtABI2	Forward	GATGGAAGATTCTGTCTCAACGATT
	Reverse	GTTTCTCCTTCACTATCTCCTCCG
qRT-AtKAI2	Forward	ACACAAGACCAATGTCAATCTCTT G
	Reverse	GTCGACTAGAAGATATGAGTGGC
qRT-AtADH1	Forward	TCCACGTATCTTCGGCCATG
	Reverse	TAGCACCTTCTGCAGCGCC
qRT-AtCHS	Forward	TCACCAACAGTGAACACATGACC
	Reverse	GAGTCAAGGTGGGTGTCAGAGG
qRT-AtNCED3	Forward	ATCTGCGCTTCACACTCCTC
	Reverse	TTAGCTCCGTTGCGCACATA
qRT-AtABF3	Forward	AGAACCTCAACCGGTGGAGAGTG
	Reverse	GGAGTCAGATCAGGTGACATCTGG
qRT-AtABF4	Forward	AACTGTGTTCAACAGATGGGTCAG
	Reverse	GGTTCCTCCGTAACTAGCTAATCC
qRT-AtICK1	Forward	ACGCACACGTAACCTAAATCG
	Reverse	GCATCTCCGTCATCAATTTCG
